# Supplementary material for: Effective Removal of Methylene Blue on EuVO4/g-C3N4 Mesoporous Nanosheets via Coupling Adsorption and Photocatalysis
Source: MDPI journal article supplement (doi:10.3390/ijms231710003), 2022-09-02
Supplement: s1 [file s1]

# **Effective removal of Methylene blue on EuVO<sub>4</sub>/g-C<sub>3</sub>N<sub>4</sub> mesoporous nanosheets via coupling adsorption and photocatalysis**

Xia Ran, Li Wang, Bo Xiao, Li Lei, Jinming Zhu, Zuoji Liu, Xiaolan Xi, Guangwei Feng, Rong Li, Jian Feng\*

*Engineering Research Center for Molecular Medicine, School of Basic Medical Sciences, Guizhou Medical University, Guiyang 550025, China*

\* Corresponding author. Tel.: +86 851 88174017

E-mail address: jfeng@gmc.edu.cn (Jian Feng)

**Table S1.** EDS Quantitative results

| Element | wt %  | atm % |
|---------|-------|-------|
| C       | 32.51 | 36.23 |
| N       | 60.76 | 59.63 |
| Eu      | 1.52  | 0.10  |
| V       | 0.51  | 0.10  |
| O       | 4.69  | 3.93  |

**Table S2.** BET surface area and pore size of CN, EV, EVC-2 and EVC-5

| Sample | S <sub>BET</sub> (m <sup>2</sup> /g) | Pore volume (cm <sup>3</sup> /g) | Pore diameter (nm) |
|--------|--------------------------------------|----------------------------------|--------------------|
| CN     | 12.32                                | 0.02                             | 12.80              |
| EV     | 49.89                                | 0.07                             | 5.65               |
| EVC-2  | 80.43                                | 0.15                             | 7.44               |
| EVC-5  | 38.14                                | 0.08                             | 8.83               |

**Table S3.** The R<sup>2</sup> and RMSE values obtained from fitting the adsorption curves of MB by different kinetic models

| Adsorbent | Pseudo first order adsorption kinetics model |         | Pseudo second order adsorption kinetics model |         | Intraparticle diffusion model |         |
|-----------|----------------------------------------------|---------|-----------------------------------------------|---------|-------------------------------|---------|
|           | R <sup>2</sup>                               | RMSE    | R <sup>2</sup>                                | RMSE    | R <sup>2</sup>                | RMSE    |
| CN        | 0.95491                                      | 0.07532 | 0.99179                                       | 0.03214 | 0.71495                       | 0.18937 |
| EVC-2     | 0.94532                                      | 0.50591 | 0.98694                                       | 0.24725 | 0.70537                       | 1.17431 |
| EVC-5     | 0.95855                                      | 0.13680 | 0.99477                                       | 0.05576 | 0.84789                       | 0.30086 |

**Table S4.** Adsorption kinetic parameters of MB on CN, EVC-2 and EVC-5

| Adsorbent | pseudo second-order                           |                                                           |                | q <sub>e</sub> (exp)<br>(mg g <sup>-1</sup> ) |
|-----------|-----------------------------------------------|-----------------------------------------------------------|----------------|-----------------------------------------------|
|           | q <sub>e</sub> (cal)<br>(mg g <sup>-1</sup> ) | K <sub>2</sub><br>(g mg <sup>-1</sup> min <sup>-1</sup> ) | R <sup>2</sup> |                                               |
| CN        | 1.14                                          | 0.135                                                     | 0.992          | 1.09                                          |
| EVC-2     | 6.99                                          | 0.023                                                     | 0.987          | 6.75                                          |
| EVC-5     | 2.44                                          | 0.031                                                     | 0.995          | 2.27                                          |

**Table S5.** The  $R^2$  and RMSE values obtained from fitting the adsorption isotherm of MB by Tempkin, Freundlich and Langmuir isotherm model on CN, EVC-2 and EVC-5

| Sample | Langmuir isotherm model |         | Freundlich isotherm model |         | Tempkin isotherm model |         |
|--------|-------------------------|---------|---------------------------|---------|------------------------|---------|
|        | $R^2$                   | RMSE    | $R^2$                     | RMSE    | $R^2$                  | RMSE    |
| CN     | 0.99824                 | 0.02889 | 0.92703                   | 0.18584 | 0.97141                | 0.11633 |
| EVC-2  | 0.99730                 | 0.26784 | 0.95722                   | 1.06568 | 0.98118                | 0.70682 |
| EVC-5  | 0.99633                 | 0.08496 | 0.95934                   | 0.28261 | 0.98964                | 0.14268 |

**Table S6.** Adsorption isotherms parameters of MB on CN, EVC-2 and EVC-5

| adsorbent | Langmuir isotherm model         |                                 |       |
|-----------|---------------------------------|---------------------------------|-------|
|           | $Q_m$<br>( $\text{mg g}^{-1}$ ) | $K_L$<br>( $\text{L mg}^{-1}$ ) | $R^2$ |
| CN        | 2.24                            | 5.72                            | 0.998 |
| EVC-2     | 20.0                            | 2.50                            | 0.997 |
| EVC-5     | 4.76                            | 5.25                            | 0.996 |

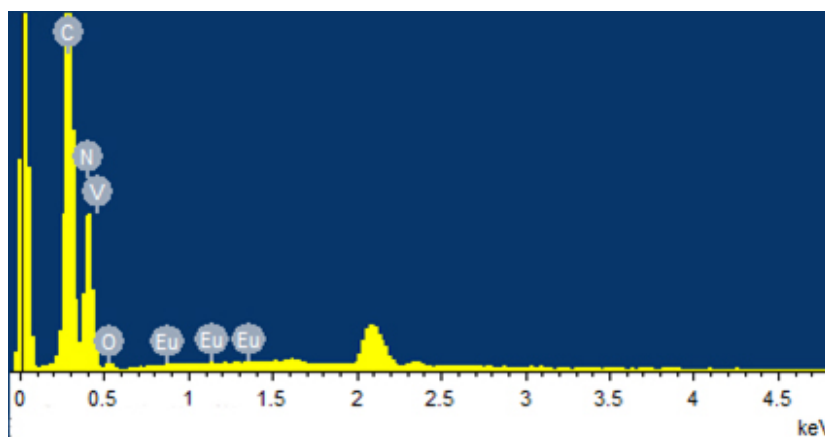

**Figure S1** EDS spectrum of EVC-2

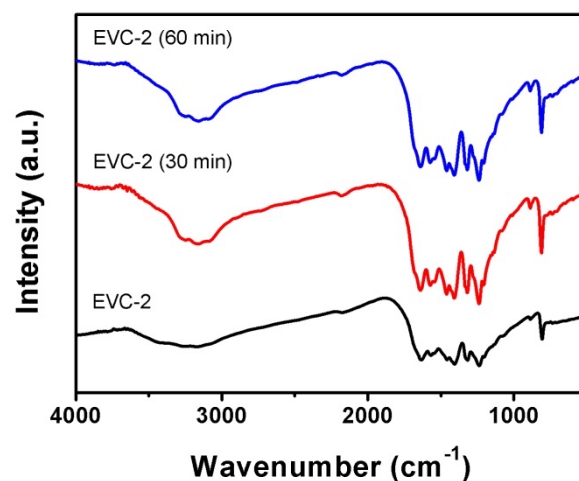

**Figure S2** FTIR spectra of EVC-2 before and after the adsorption of MB with different time

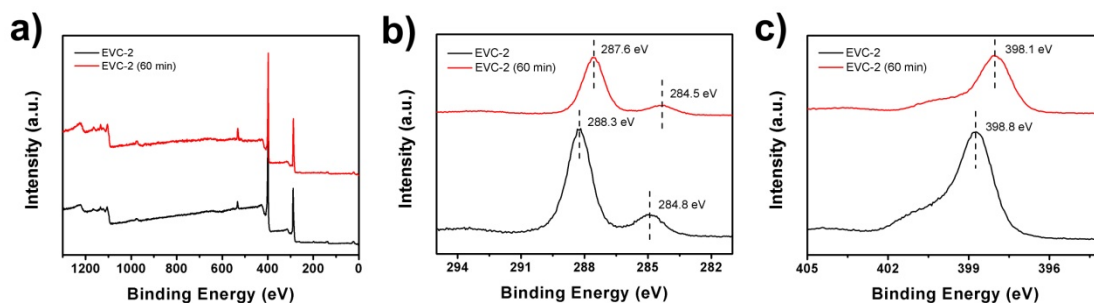

**Figure S3** XPS spectra of EVC-2 before and after the adsorption of MB

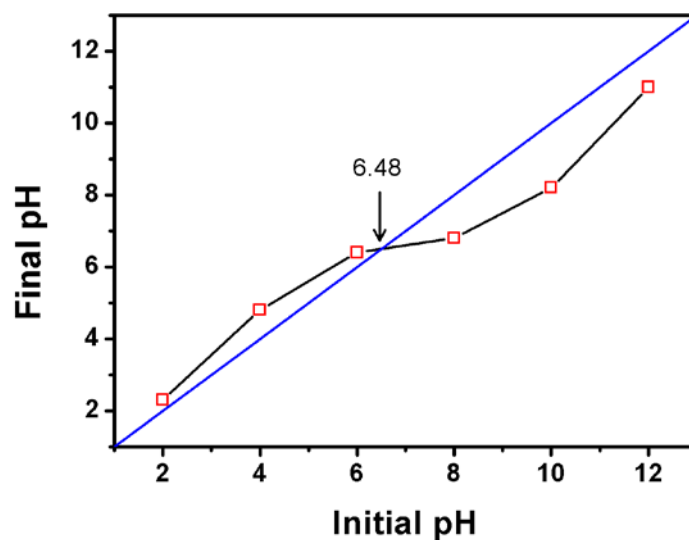

**Figure S4** The point of zero charge ( $\text{pH}_{\text{pzc}}$ ) of EVC-2: Bisector method

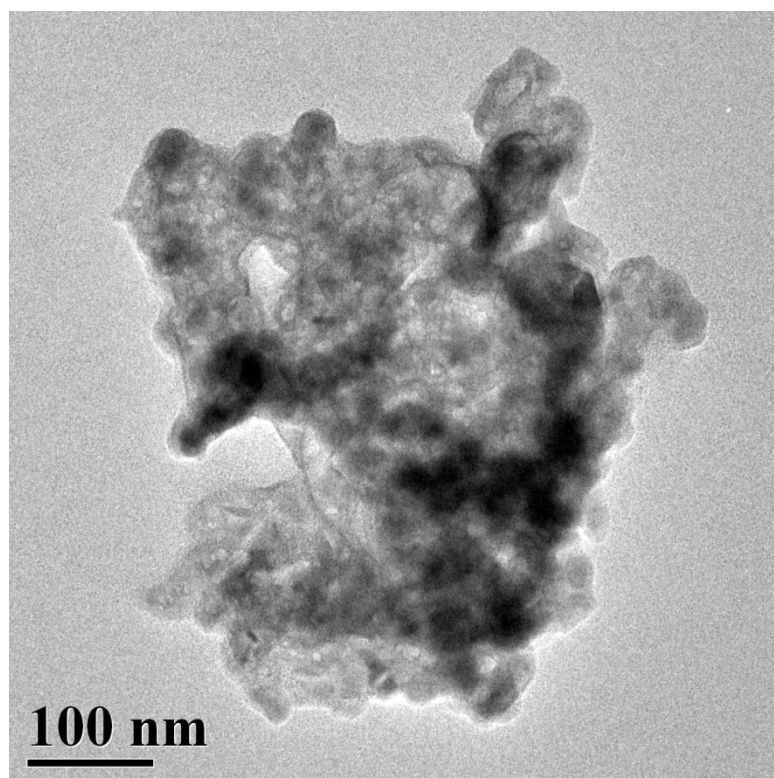

**Figure S5** TEM image of used EVC-2

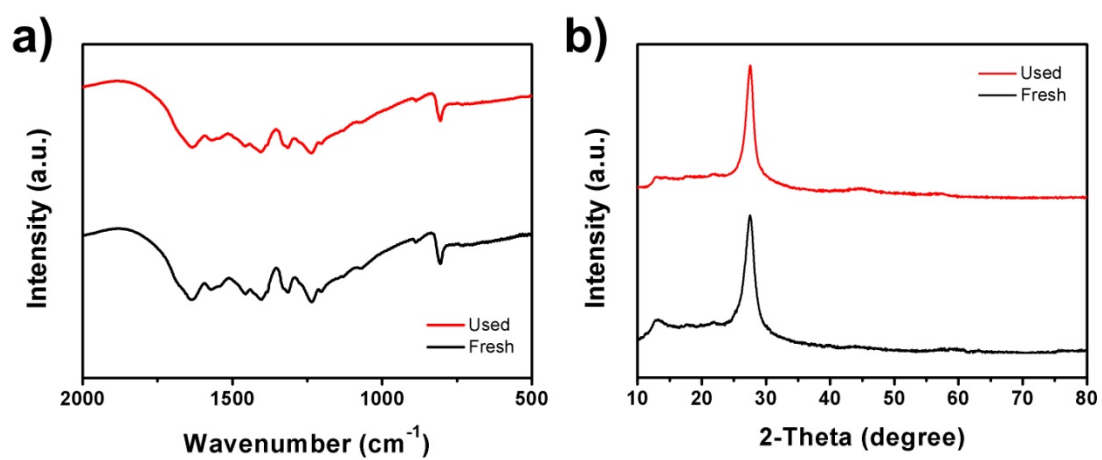

**Figure S6** a) FTIR spectra and b) XRD patterns of fresh and used EVC-2

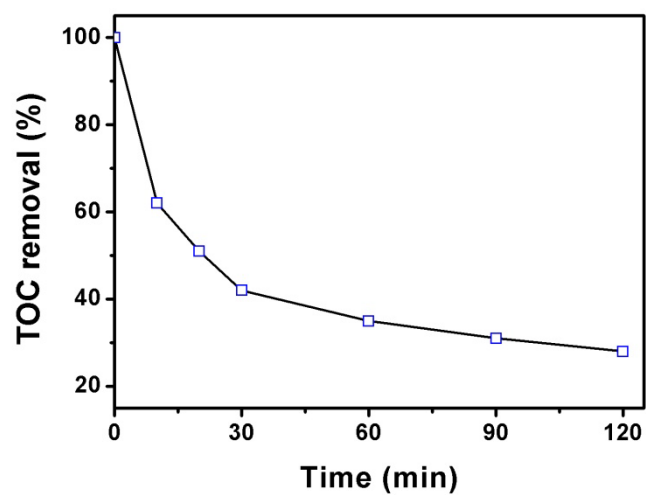

**Figure S7** TOC removal efficiency of MB over EVC-2

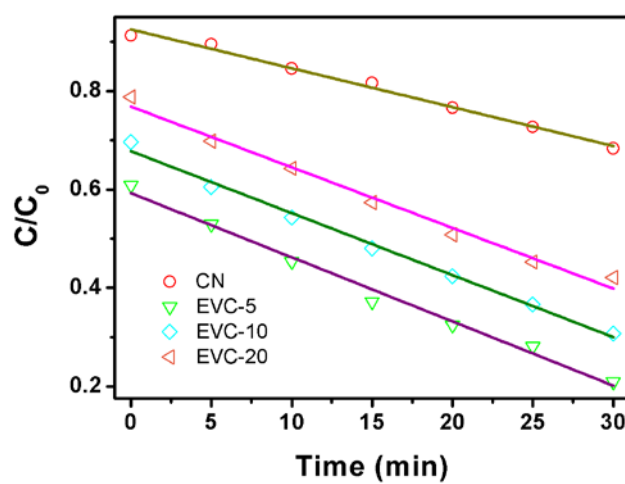

**Figure S8** Zero order kinetics curve of MB degradation on CN, EVC-5, EVC-10 and EVC-20
